# Supplementary material for: The Use of Gamification and Incentives in Mobile Health Apps to Improve Medication Adherence: Scoping Review
Source: PubMed Central journal article supplement (PMC8902658; doi:10.2196/30671), 2022-02-21
Supplement: mhealth_v10i2e30671_app1.pdf [file mhealth_v10i2e30671_app1.pdf]

## Multimedia Appendix 1: Full search term strategy for Embase Database

Embase via Ovid SP (1947 to September 24, 2020):

(video game/ or game/ or gamify\*\* .mp. or motivation/ or reward/ or incentive\* .mp. or reward\* .mp. or gift\* .mp.) and (patient compliance/ or medication compliance/ or [ader\* or non-adher\* or nonadher\*] .mp. or concordance .mp.) and (mobile application .mp. or mobile application/ or mhealth .mp. or medical technology/ or technology/ or mobile phone/ or software/ or healthcare software/ or application .mp.)
