# Supplementary material for: The Use of Gamification and Incentives in Mobile Health Apps to Improve Medication Adherence: Scoping Review
Source: PubMed Central journal article supplement (PMC8902658; doi:10.2196/30671), 2022-02-21
Supplement: mhealth_v10i2e30671_app2.pdf [file mhealth_v10i2e30671_app2.pdf]

Multimedia Appendix 2: Characteristics and findings of the studies pertaining to Objective 1

| Article (Country <sup>a</sup> and year)                    | Aim                                                                                                                                                                          | Description of intervention                                                                                                                                                                                                                        | Patient population, sample size                                                                                                                                   | Gamification and/or Incentives used?                                                                                                                        | Underpinning theory or framework                                                                    | Patient involvement in development of the intervention    | Results                                                                                                                                                                                                                                                                                                                                                                                                                                     |
|------------------------------------------------------------|------------------------------------------------------------------------------------------------------------------------------------------------------------------------------|----------------------------------------------------------------------------------------------------------------------------------------------------------------------------------------------------------------------------------------------------|-------------------------------------------------------------------------------------------------------------------------------------------------------------------|-------------------------------------------------------------------------------------------------------------------------------------------------------------|-----------------------------------------------------------------------------------------------------|-----------------------------------------------------------|---------------------------------------------------------------------------------------------------------------------------------------------------------------------------------------------------------------------------------------------------------------------------------------------------------------------------------------------------------------------------------------------------------------------------------------------|
| <b>de Oliveira et al[35] (Spain, 2010)</b>                 | Evaluate a game app designed to improve medication adherence through social competition.                                                                                     | Elderly patients participated in a 6-week study consisting of 3 weeks dose tracking only app and 3 weeks of the same app with additional game elements.                                                                                            | Mobile-using elderly patients who take at least one medication twice a day (n = 18).<br><br>Median age: 67.5 years (59 – 75).                                     | Participants reimbursed for study participation but not part of the app.<br><br>Social leader board (point system) was used in the game intervention.       | Application draws from two psychological theories; goal-setting theory and trans-theoretical model. | Not reported, 2 clinicians were involved in design phase. | Total missed doses are 15 and 6 out of the total 1512 over the six-week period in the tracker only and game app, respectively. ( $Z = -2.263$ , $P = 0.024$ ) Indicates a modest but significant benefit with the game app. Strong negative correlation ( $P = -0.552$ , $p = 0.018$ ) that age was associated with non-compliance in the tracking only app which was not observed in the game intervention ( $P = -0.077$ , $p = 0.761$ ). |
| <b>Kim et al[31] (South Korea, 2018)</b>                   | Evaluate the use of a game app designed to increase medication adherence, decrease chemotherapy adverse effects, and improve psychological status in breast cancer patients. | An unblinded study: cancer patients were prospectively followed for 3 weeks after randomization to a game app or conventional education. Outcomes were time spent for education, medication adherence, physical and psychological adverse effects. | Patients undergoing cytotoxic chemotherapy for breast cancer randomized to a mobile game (n = 36) or conventional education (n = 40).<br>Median age: 50 (18 – 65) | The game app included the following features: quests, level ups, in game rewards, avatar customisations. Also includes multiplayer/social network features. | Not reported                                                                                        | Not reported                                              | At the end of the 3 weeks, the app significantly improved medication adherence compared to conventional education ( $P < 0.001$ )                                                                                                                                                                                                                                                                                                           |
| <b>Lakshminarayana et al[32] (UK &amp; Scotland, 2017)</b> | Assess an app that promotes disease and treatment management in Parkinson's disease patients.                                                                                | Parkinson's disease patients randomized to either the mHealth app or standard of care. Primary outcome was medication adherence scores <sup>b</sup> at 16 weeks.                                                                                   | Parkinson's disease patients, n = 158 (n = 68 in app group, n = 90 in standard of care group).<br>Mean age: 60 years                                              | App includes games to track physical responsiveness and cognition                                                                                           | Not reported                                                                                        | Not reported                                              | At the end of the 16 weeks, the app significantly improved adherence compared to standard of care group (mean difference: 0.39, 95% CI 0.04-0.74; $P = 0.0304$ )                                                                                                                                                                                                                                                                            |

|                                           |                                                                                                                                                                    |                                                                                                                                                                                                                                                   |                                                                                                                                                                         |                                                                                                                                                                       |                                                                                                                                                        |                                                                                                                                     |                                                                                                                                                                                                                                          |
|-------------------------------------------|--------------------------------------------------------------------------------------------------------------------------------------------------------------------|---------------------------------------------------------------------------------------------------------------------------------------------------------------------------------------------------------------------------------------------------|-------------------------------------------------------------------------------------------------------------------------------------------------------------------------|-----------------------------------------------------------------------------------------------------------------------------------------------------------------------|--------------------------------------------------------------------------------------------------------------------------------------------------------|-------------------------------------------------------------------------------------------------------------------------------------|------------------------------------------------------------------------------------------------------------------------------------------------------------------------------------------------------------------------------------------|
| <b>Wiecek et al[34] (Australia, 2020)</b> | Analyse the impact over time of a multicomponent app on medication adherence in patients with chronic conditions.                                                  | A retrospective observational study assessing the use of a multiple component app over 3-months and 6-months. Adherence was the primary outcome measured through mobile direct observation of therapy and defined as dose taken and timing taken. | Patients were included if they had any chronic condition (not specified). A total of 243 users were included in the 3-months and 6-month analysis. Mean age: 43.8 years | The app included the following features: gamification, dosage reminders, incentives (lottery of gift cards), educational components, and social community components. | The application utilises the self-determination theory.                                                                                                | Not reported                                                                                                                        | Median adherence was 96.6% and 96.8% over 3-months and 6-months, respectively. No significant differences in adherence rates over time in the 3-month and 6-month cohort.                                                                |
| <b>Whiteley et al[33] (USA, 2018)</b>     | A randomised control trial to examine the effects of a game app on antiretroviral therapy adherence, viral load, knowledge and attitudes in youth living with HIV. | Participants are randomised to the HIV game intervention or a non-HIV-related game (control) and followed over 16 weeks.                                                                                                                          | Youth living with HIV (n = 61). Mean age: 22 years (14 – 26).                                                                                                           | The app contains a quiz feature that allows users to earn 'strength' and points.                                                                                      | The study refers to prior work[34] which mentioned Social learning theory and the information-motivation-behavioural skills model of behaviour change. | Prior work[34] included youth living with HIV who contributed to the game features via thematic analysis of qualitative interviews. | Patients newly starting antiretroviral therapy in the HIV game intervention group were more adherent than those in the control group (71% vs 48%, $P = 0.05$ ). Intervention group had less viral load and more HIV & therapy knowledge. |

<sup>a</sup> Location of study

<sup>b</sup> Medication adherence scores based on Morsiky medication adherence scale -8.
