# Supplementary material for: The Use of Gamification and Incentives in Mobile Health Apps to Improve Medication Adherence: Scoping Review
Source: PubMed Central journal article supplement (PMC8902658; doi:10.2196/30671), 2022-02-21
Supplement: mhealth_v10i2e30671_app3.pdf [file mhealth_v10i2e30671_app3.pdf]

Multimedia Appendix 3: Summary of the risk of bias appraisal for the studies pertaining to Objective 1

| Article                   | Risk of Bias                                         | Risk of Bias assessment | Comments                                                                                                                                                                                                                                                                                                                                                                                                                                                                                                                                                                                                                                                                                                             |
|---------------------------|------------------------------------------------------|-------------------------|----------------------------------------------------------------------------------------------------------------------------------------------------------------------------------------------------------------------------------------------------------------------------------------------------------------------------------------------------------------------------------------------------------------------------------------------------------------------------------------------------------------------------------------------------------------------------------------------------------------------------------------------------------------------------------------------------------------------|
| Kim et al[31]             | Cochrane Risk of Bias 2.0 Tool for Randomised trials | Low risk of bias        |                                                                                                                                                                                                                                                                                                                                                                                                                                                                                                                                                                                                                                                                                                                      |
| Lakshminarayana et al[32] | Cochrane Risk of Bias 2.0 Tool for Randomised trials | Low risk of bias        |                                                                                                                                                                                                                                                                                                                                                                                                                                                                                                                                                                                                                                                                                                                      |
| Whiteley et al[33]        | Cochrane Risk of Bias 2.0 Tool for Randomised trials | Some concerns           | Although the aim was to examine the effects of the intervention, the total cohort results were not provided, indicating a risk of selective reporting. A significant result in the subgroup analysis. (Nonsignificant results for the whole cohort and the self-report medication adherence outcomes in the subgroup analysis were not reported in the abstract.                                                                                                                                                                                                                                                                                                                                                     |
| de Oliveira et al[35]     | ROBINS-I                                             | Low risk of bias        |                                                                                                                                                                                                                                                                                                                                                                                                                                                                                                                                                                                                                                                                                                                      |
| Wiecek et al[34]          | ROBINS-I                                             | Serious risk of bias    | Potential relationship between inactive use of app and medication nonadherence as adherence was monitored via the app. Retrospective classification of subjects based on duration of available app data of 3 months and 6 months and excluding any participants with < 30% active use of app. The number of recruited participants not eligible or dropped out due to < 30% active use of app were not reported for both cohorts and potential for participants with 6 months data with < 30% active use and high adherence usage for the first 3 months to be included in the 3-month analysis. The study results may be valid for patients who are adherent to the app but cannot be generalised to all app users. |
